# Supplementary material
Source: Springer Nature journal article supplement (https://www.springermedizin.de/resource/supplementary/12889_2011_3802_MOESM1_ESM.pdf/9492446)
Supplement: MOESM1 [file 9492446]

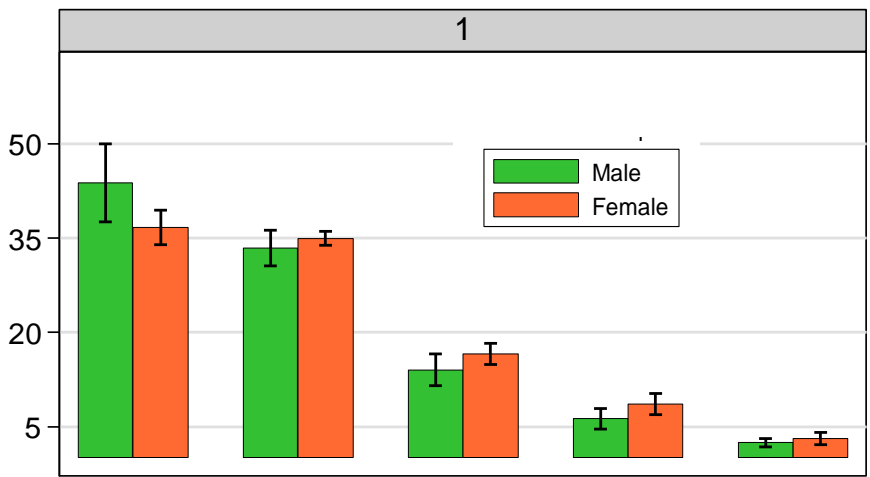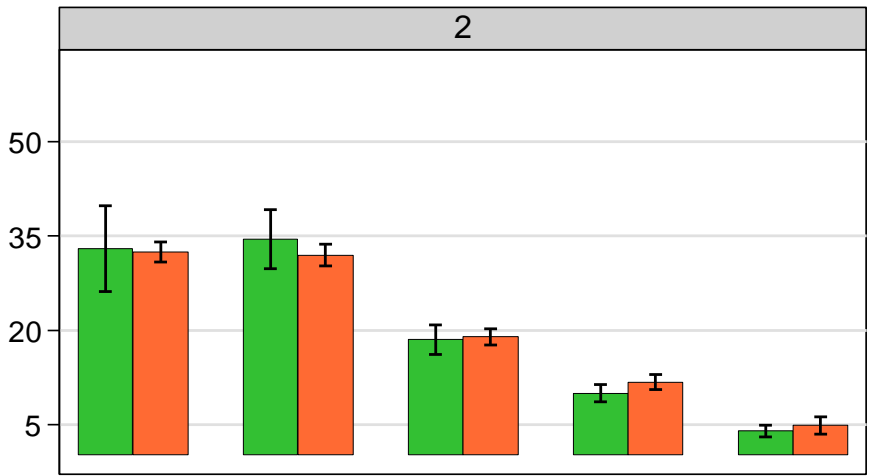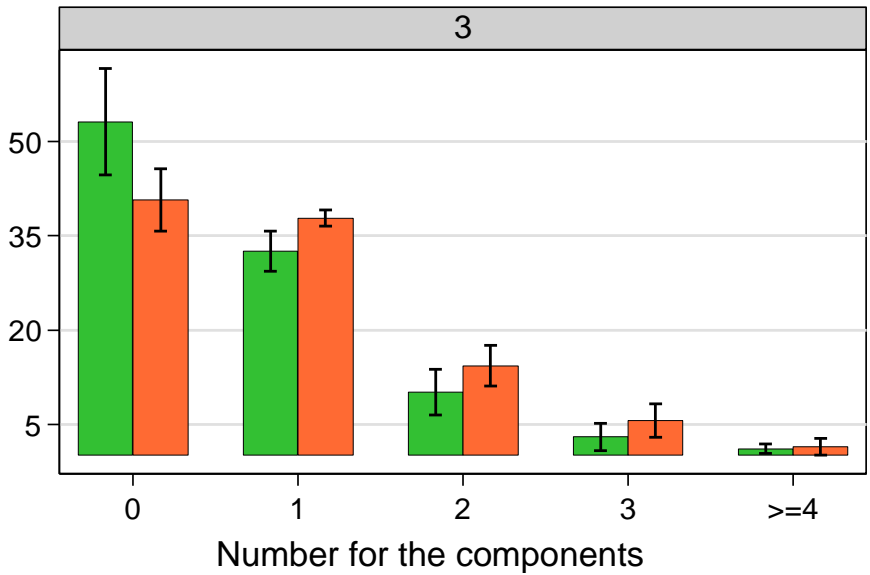

\* panel 1 represents the whole region; panel 2 represents the urban area; panel 3 represents rural area.
